# Supplementary material for: Multi-tiered analyses of honey bees that resist or succumb to parasitic mites and viruses
Source: PubMed Central journal article supplement (PMC8493683; doi:10.1186/s12864-021-08032-z), 2021-10-06
Supplement: 12864_2021_8032_MOESM1_ESM.pdf [file 12864_2021_8032_MOESM1_ESM.pdf]

## Supplemental Figures

Figure S1. Heatmap of the sample-to-sample distance in R\_mite v. R\_control and S\_mite v. S\_control samples compiled using the R package DESeq2 with a customized map function, (<http://bioconductor.org/packages/release/bioc/vignettes/DESeq2/inst/doc/DESeq2.html#heatmap-of-the-sample-to-sample-distances>).

Figure S2. A) Principal Component Analysis of Gene Expression Data produced by DESeq 2 for R\_mite, R\_control, S\_mite, and S\_control. Note that PC1 captures 74% of the total variance between the samples, and shows the extreme divergence of R\_mite from S\_mite and S\_control. PC2 provides differentiation of R\_control from R\_mite, revealing much of the gene expression differences attributable to mite infestation of the R genetic background. B) Principal Component Analysis of Differential Gene Expression data, contrasting R bees injected with virus, R\_Virus, S bees injected with virus, S\_Virus, and R & S bees injected only with a phosphate buffer solution, R\_PBS and S\_PBS; R\_Virus and S\_Virus are divergent in RNA sequencing data that comprise principal component 1; Principal component 2 captures the different responses to virus versus control injection in the R samples, and differences between the two S samples in response to buffer injection.

Figure S3. a) Scatterplot in semantic space of GO BP enrichment for UP in R\_virus v. S\_virus,  $FDR < 0.05$  and  $\log FC > 1.5$ . b) Scatterplot in semantic space of GO MF enrichment from HymenopteraMine set operation of Asymmetric Difference of UP in R\_virus v. S\_virus MINUS UP in R\_virus v. R\_PBS, genes with  $FDR < 0.05$  and  $\log FC > 1.5$ .

Figure S4. a) Deformed wing virus (DWV) loads as dCT, analyzed separately by ANOVA for each treatment (Control or Virus) in each colony. Comparison of means for each pair indicates two virus-injected samples which maintained very low virus levels, G2, and B5. B) ANOVA stats and means for each sample set.

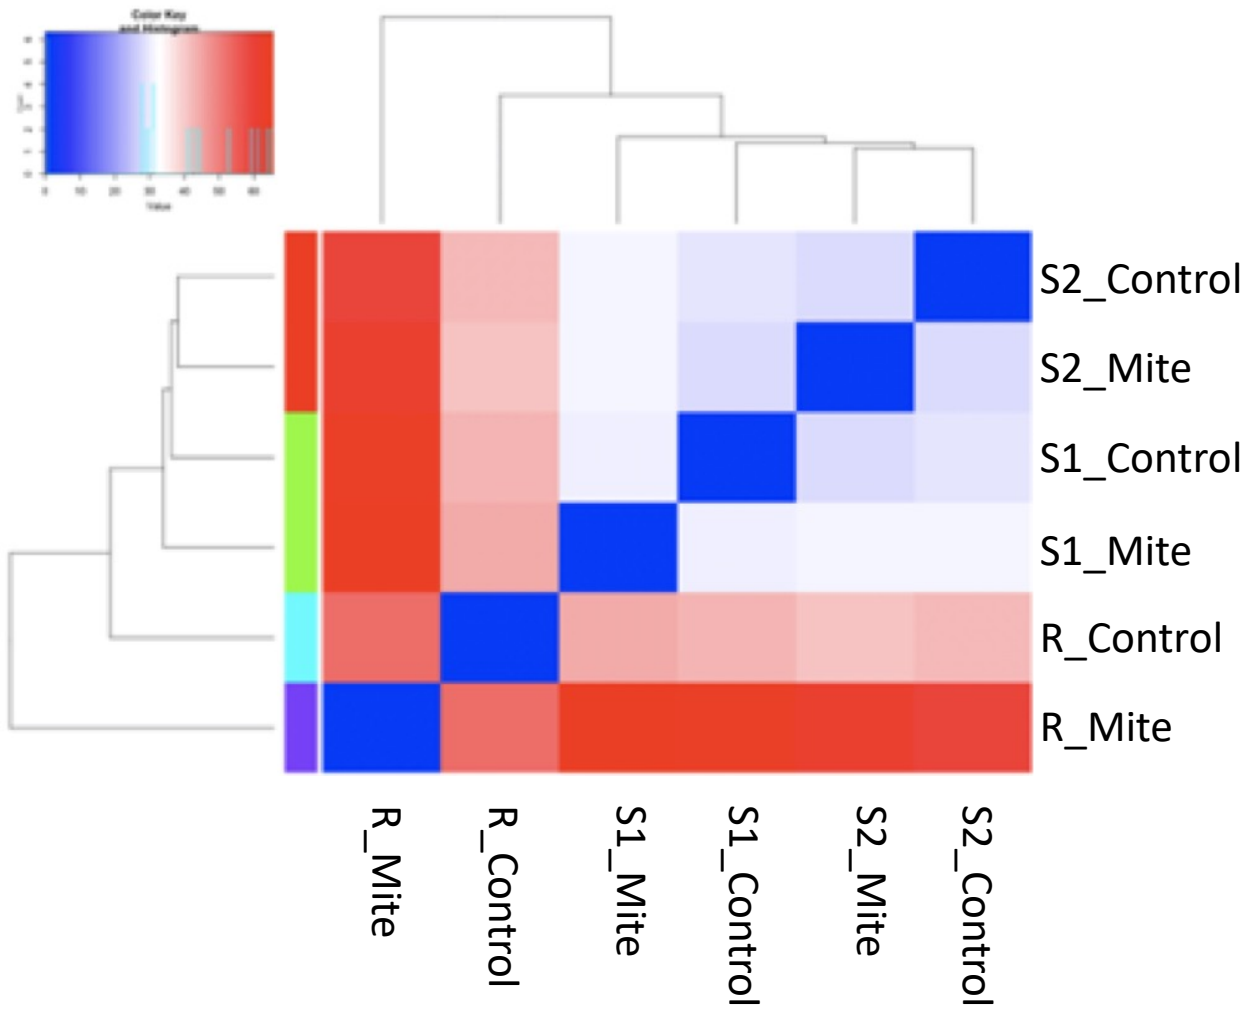

Figure S1

a)

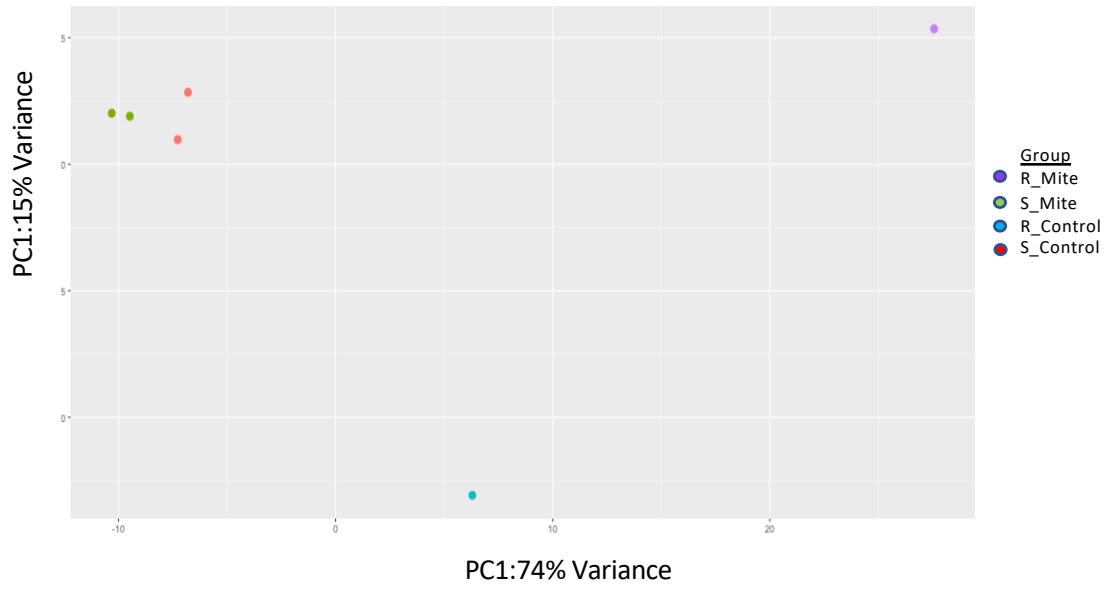

b)

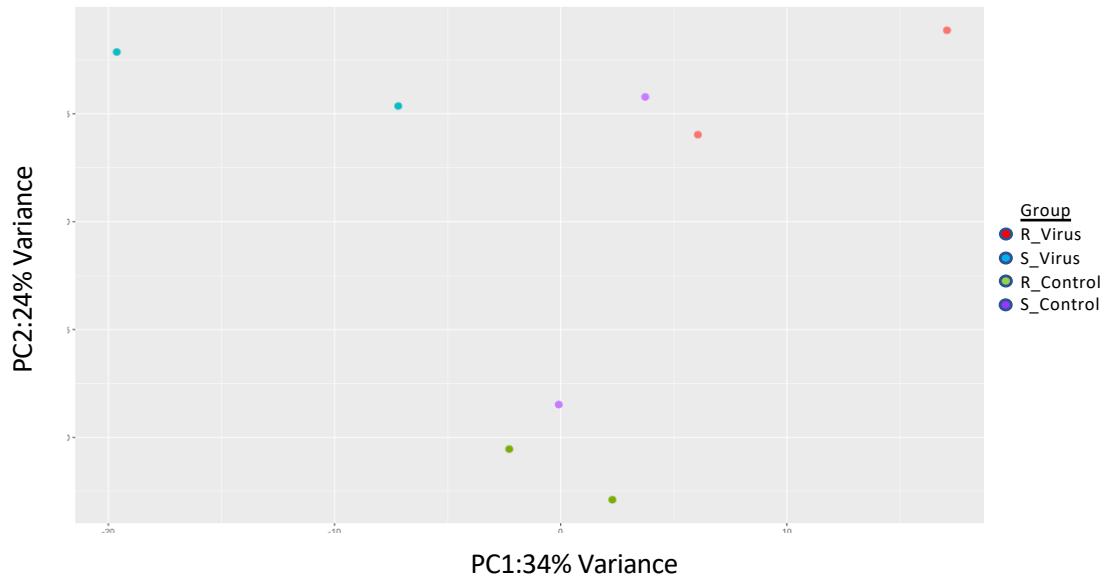

Figure S2

a)

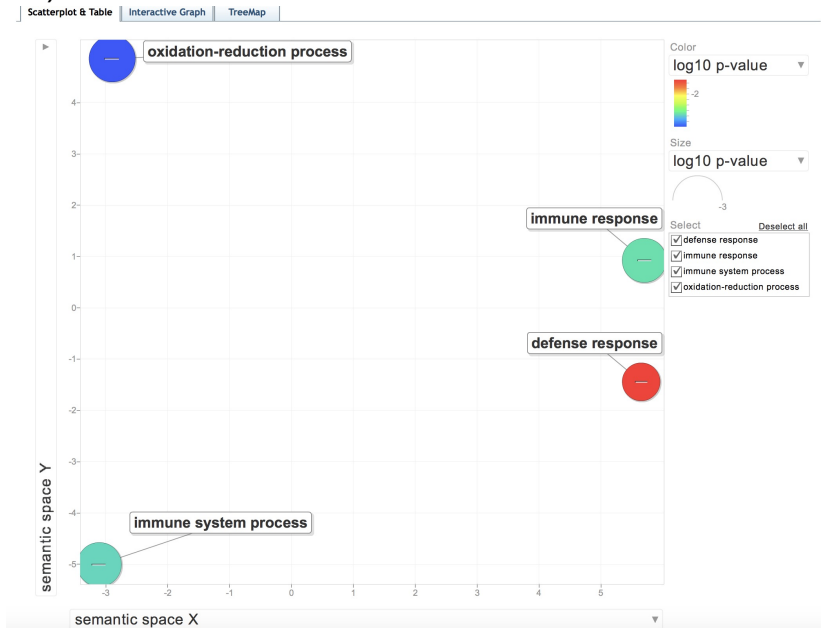

b)

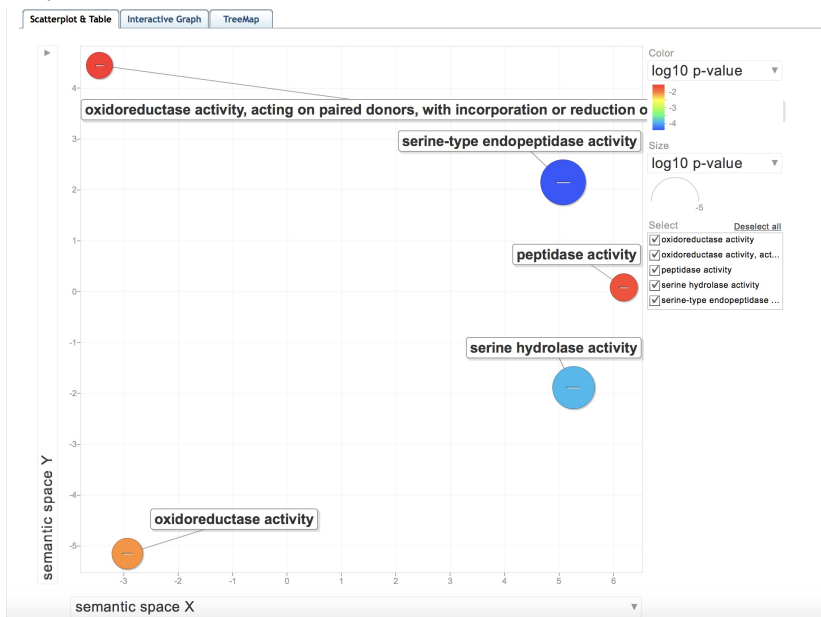

Figure S3

A)

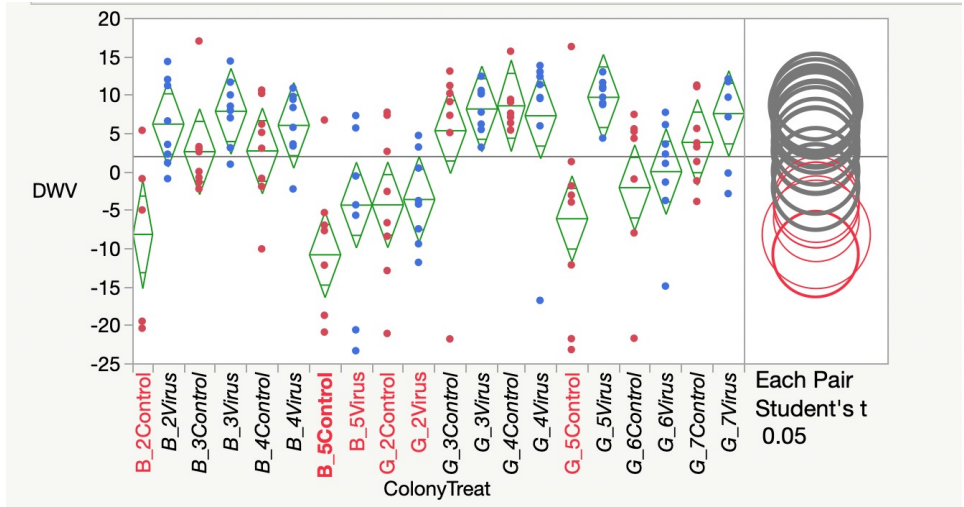

B)

▼ **Oneway Anova**

▼ **Summary of Fit**

|                            |          |
|----------------------------|----------|
| Rsquare                    | 0.394387 |
| Adj Rsquare                | 0.309779 |
| Root Mean Square Error     | 7.983688 |
| Mean of Response           | 2.014231 |
| Observations (or Sum Wgts) | 156      |

▼ **Analysis of Variance**

| Source      | DF  | Sum of Squares | Mean Square | F Ratio | Prob > F |
|-------------|-----|----------------|-------------|---------|----------|
| ColonyTreat | 19  | 5645.125       | 297.112     | 4.6614  | <.0001*  |
| Error       | 136 | 8668.541       | 63.739      |         |          |
| C. Total    | 155 | 14313.666      |             |         |          |

▼ **Means for Oneway Anova**

| Level      | Number | Mean    | Std Error | Lower 95% | Upper 95% |
|------------|--------|---------|-----------|-----------|-----------|
| B_2Control | 5      | -8.122  | 3.5704    | -15.18    | -1.06     |
| B_2Virus   | 8      | 6.244   | 2.8227    | 0.66      | 11.83     |
| B_3Control | 8      | 2.651   | 2.8227    | -2.93     | 8.23      |
| B_3Virus   | 8      | 7.920   | 2.8227    | 2.34      | 13.50     |
| B_4Control | 8      | 2.751   | 2.8227    | -2.83     | 8.33      |
| B_4Virus   | 8      | 6.079   | 2.8227    | 0.50      | 11.66     |
| B_5Control | 8      | -10.781 | 2.8227    | -16.36    | -5.20     |
| B_5Virus   | 8      | -4.306  | 2.8227    | -9.89     | 1.28      |
| G_2Control | 8      | -4.274  | 2.8227    | -9.86     | 1.31      |
| G_2Virus   | 8      | -3.574  | 2.8227    | -9.16     | 2.01      |
| G_3Control | 8      | 5.388   | 2.8227    | -0.19     | 10.97     |
| G_3Virus   | 8      | 8.218   | 2.8227    | 2.64      | 13.80     |
| G_4Control | 7      | 8.629   | 3.0176    | 2.66      | 14.60     |
| G_4Virus   | 8      | 7.334   | 2.8227    | 1.75      | 12.92     |
| G_5Control | 8      | -6.084  | 2.8227    | -11.67    | -0.50     |
| G_5Virus   | 8      | 9.744   | 2.8227    | 4.16      | 15.33     |
| G_6Control | 8      | -2.038  | 2.8227    | -7.62     | 3.54      |
| G_6Virus   | 8      | 0.059   | 2.8227    | -5.52     | 5.64      |
| G_7Control | 8      | 3.861   | 2.8227    | -1.72     | 9.44      |
| G_7Virus   | 8      | 7.613   | 2.8227    | 2.03      | 13.19     |

Std Error uses a pooled estimate of error variance
